# Supplementary material
Source: PubMed Central journal article supplement (PMC3899026)
Supplement: mmc1.pdf [file mmc1.pdf]

# THE LANCET

## **Supplementary appendix**

This appendix formed part of the original submission and has been peer reviewed. We post it as supplied by the authors.

Supplement to: Fazel S, Wolf A, Långström N, Newton CR, Lichtenstein P. Premature mortality in epilepsy and the role of psychiatric comorbidity: a total population study. *Lancet* 2013; published online July 22. [http://dx.doi.org/10.1016/S0140-6736\(13\)60899-5](http://dx.doi.org/10.1016/S0140-6736(13)60899-5).

**Supplemental table 1.** Risks of natural causes of death after diagnosis with epilepsy, stratified by diagnostic threshold, sex, severity, patient type, epilepsy subtype, age group, birth order, and time after first diagnosis of epilepsy.

|                            | Natural causes of death |                  | Deaths from neoplasms |                  | Deaths caused by diseases of the nervous system |                    |
|----------------------------|-------------------------|------------------|-----------------------|------------------|-------------------------------------------------|--------------------|
|                            |                         |                  |                       |                  |                                                 |                    |
| No epilepsy (n=660,869)    | 2,791 (57.1%)           | 1.0 (ref)        | 1,146 (23.4%)         | 1.0 (ref)        | 124 (2.5%)                                      | 1.0 (ref)          |
| <b>Epilepsy</b>            |                         |                  |                       |                  |                                                 |                    |
| <i>Sex</i>                 |                         |                  |                       |                  |                                                 |                    |
| Male (n=36,999)            | 711 (81.2%)             | 14.9 (13.9-16.0) | 757 (20.0%)           | 12.3 (10.9-13.9) | 750 (19.8%)                                     | 60.6 (46.4-79.1)   |
| Female (n=32,996)          | 2,108 (89.0%)           | 16.4 (15.0-17.8) | 659 (27.8%)           | 10.2 (9.0-11.5)  | 559 (23.6%)                                     | 93.3 (64.0-136.2)  |
| <i>Threshold</i>           |                         |                  |                       |                  |                                                 |                    |
| ≥1 diagnoses (n=69,995)    | 5,183 (84.2%)           | 15.5 (14.6-16.4) | 1,416 (23.0%)         | 11.2 (10.3-12.2) | 1,309 (21.3%)                                   | 71.1 (57.3-88.4)   |
| ≥2 diagnoses (n=48,105)    | 3,619 (87.1%)           | 16.7 (15.6-17.8) | 918 (22.1%)           | 11.1 (10.0-12.4) | 1,034 (24.9%)                                   | 91.5 (70.0-119.7)  |
| <i>Severity</i>            |                         |                  |                       |                  |                                                 |                    |
| Less severe (n=62,143)     | 3,804 (82.6%)           | 13.7 (12.9-14.6) | 1,100 (23.9%)         | 10.4 (9.5-11.5)  | 948 (20.6%)                                     | 60.0 (47.7-75.5)   |
| More severe (n=7,852)      | 1,379 (89.0%)           | 26.9 (23.4-30.9) | 316 (20.4%)           | 14.6 (11.9-18.0) | 361 (23.3%)                                     | 193.8 (95.0-395.3) |
| <i>Source</i>              |                         |                  |                       |                  |                                                 |                    |
| Inpatient (n=50,071)       | 4,932 (84.8%)           | 16.5 (15.6-17.5) | 1,316 (22.6%)         | 11.6 (10.6-12.8) | 1,258 (21.6%)                                   | 77.2 (61.2-97.4)   |
| Outpatient only (n=19,924) | 251 (74.7%)             | 8.2 (6.8-9.8)    | 100 (29.8%)           | 7.6 (5.8-10.0)   | 51 (15.2%)                                      | 35.1 (18.6-66.4)   |

|                                  |               |                  |             |                  |             |                       |
|----------------------------------|---------------|------------------|-------------|------------------|-------------|-----------------------|
| <i>Type of seizures *</i>        |               |                  |             |                  |             |                       |
| Complex partial (n=8,382)        | 375 (87.0%)   | 13.4 (11.2-16.1) | 431 (43.9%) | 15.7 (12.2-20.3) | 73 (16.9%)  | 54.6 (27.6-108.1)     |
| Other partial (n=5,857)          | 310 (84.9%)   | 14.0 (11.4-17.3) | 163 (44.7%) | 19.6 (14.7-26.1) | 68 (18.6%)  | 30.3 (14.7-62.5)      |
| Generalized (n=15,315)           | 1,281 (87.7%) | 13.0 (11.5-14.7) | 214 (14.7%) | 5.5 (4.5-6.8)    | 439 (30.1%) | 92.2 (56.0-151.6)     |
| Other and unspecified (n=40,441) | 3,217 (82.5%) | 17.0 (15.9-18.3) | 850 (21.8%) | 11.6 (10.4-13.0) | 729 (18.7%) | 74.8 (56.6-98.9)      |
| <i>Type of epilepsy **</i>       |               |                  |             |                  |             |                       |
| Focal (n=12,841)                 | 559 (91.0%)   | 14.6 (12.6-16.8) | 305 (49.7%) | 18.4 (15.1-22.5) | 108 (17.6%) | 51.2 (29.8-88.1)      |
| Generalized (n=7,593)            | 146 (85.9%)   | 8.4 (6.6-10.8)   | 27 (15.9%)  | 3.0 (1.9-4.7)    | 51 (30.0%)  | 92.6 (33.2-258.6)     |
| Encephalopathy & mixed (n=1,894) | 195 (95.1%)   | 56.1 (38.5-81.8) | 41 (20.0%)  | 18.6 (10.6-32.7) | 51 (24.9%)  | 236.7 (55.3-1,012.7)  |
| Special syndromes (n=894)        | 109 (73.6%)   | 23.2 (15.4-35.0) | 19 (12.8%)  | 6.7 (3.6-12.4)   | 15 (10.1%)  | 85.1 (10.8-667.9)     |
| Other epilepsy (n=710)           | 46 (85.2%)    | 21.4 (12.4-36.7) | 16 (29.6%)  | 24.0 (9.4-61.7)  | 11 (20.4%)  | 55.6 (11.6-266.6)     |
| Unspecified epilepsy (n=29,997)  | 1,839 (83.9%) | 17.4 (15.9-18.9) | 557 (25.4%) | 12.7 (11.1-14.6) | 398 (18.2%) | 81.6 (57.9-115.1)     |
| <i>Age at death</i>              |               |                  |             |                  |             |                       |
| 0-15 (n=69,995)                  | 1,070 (96.0%) | 74.6 (56.0-99.3) | 97 (8.7%)   | 14.2 (8.0-25.2)  | 791 (29.1%) | 196.5 (77.0-501.3)    |
| 16-25 (n=68,877)                 | 778 (85.2%)   | 34.6 (27.2-44.1) | 135 (14.8%) | 14.3 (9.2-22.1)  | 310 (34.0%) | 525.5 (126.9-2,176.4) |
| 26-35 (n=67,963)                 | 992 (78.2%)   | 18.6 (16.1-21.5) | 331 (26.1%) | 20.2 (16.0-25.4) | 295 (23.3%) | 65.3 (39.3-108.5)     |
| 36-45 (n=66,691)                 | 1,298 (79.3%) | 13.3 (12.1-14.7) | 465 (28.4%) | 12.1 (10.5-13.9) | 256 (15.6%) | 59.5 (40.1-88.4)      |

|                          |               |                   |             |                    |               |                     |
|--------------------------|---------------|-------------------|-------------|--------------------|---------------|---------------------|
| 46-56 (n=65,055)         | 1,045 (85.4%) | 10.0 (9.1-11.0)   | 388 (31.7%) | 8.6 (7.4-9.9)      | 124 (10.1%)   | 31.7 (21.3-47.2)    |
| <i>Birth order</i>       |               |                   |             |                    |               |                     |
| Firstborn (n=21,131)     | 1,572 (85.7%) | 15.5 (14.1-17.2)  | 462 (25.2%) | 12.1 (10.4-14.1)   | 373 (20.3%)   | 74.3 (48.9-112.9)   |
| Not firstborn (n=27,306) | 1,741 (84.7%) | 17.6 (16.0-19.5)  | 435 (21.2%) | 11.7 (10.0-13.8)   | 485 (23.6%)   | 89.1 (60.6-131.0)   |
| No siblings (n=21,558)   | 1,870 (82.6%) | 13.8 (12.6-15.2)  | 519 (22.9%) | 9.6 (8.4-11.0)     | 451 (19.9%)   | 55.9 (39.7-78.8)    |
| <i>Time period</i>       |               |                   |             |                    |               |                     |
| 0-182 days (n=69,995)    | 799 (89.2%)   | 91.5 (69.0-121.4) | 340 (37.9%) | 151.5 (91.9-249.6) | 140 (15.6%)   | 316.8 (50.6-1985.4) |
| 183-365 days (n=69,096)  | 446 (88.5%)   | 43.6 (33.4-57.0)  | 197 (39.1%) | 62.5 (40.5-96.5)   | 74 (14.7%)    | 139.1 (29.2-662.4)  |
| ≥ 366 days (n=68,592)    | 3,938 (82.8%) | 12.4 (11.7-13.2)  | 879 (18.5%) | 7.3 (6.6-8.0)      | 1,095 (23.0%) | 66.2 (52.8-82.9)    |

**Note:** Adjusted odds ratios (aOR) report odds of mortality in individuals with epilepsy compared to general population controls (matched for age and sex, and adjusted for income, and marital and immigration statuses).

\* Complex partial (ICD-8: 345.31; ICD-9: 345M, 345N; ICD-10: G40.2); Other partial (ICD-8: 345.30, 345.38, 345.39; ICD-10: G40.0, G40.1); Generalized (ICD-8: 345.00, 345.09, 345.10, 345.11; ICD-9: 345J, 345K; ICD-10: G40.3); Other & unspecified (ICD-8: 345.18, 345.19, 345.20, 345.29, 345.32, 345.33, 345.9; ICD-9: 345L, 345P, 345Q, 345W, 345X; ICD-10: G40.4, G40.5, G40.6, G40.7, G40.8, G40.9, G41).

\*\* Focal (ICD-10: G40.0, G40.1, G40.2); Generalized (ICD-10: G40.3); Encephalopathy & mixed (ICD-10: G40.4); Special syndromes (ICD-10: G40.5); Other epilepsy (ICD-10: G40.8); Unspecified epilepsy (ICD-10: G40.6, G40.7, G40.9).

**Supplemental table 2.** Associations of natural causes of death in epilepsy with psychiatric comorbidity

| Diagnostic group                      | Natural causes of death |                  | Deaths from neoplasms |                  | Deaths caused by diseases of the nervous system |                    |
|---------------------------------------|-------------------------|------------------|-----------------------|------------------|-------------------------------------------------|--------------------|
|                                       | <i>n</i> (%)            | aOR (95% CI)     | <i>n</i> (%)          | aOR (95% CI)     | <i>n</i> (%)                                    | aOR (95% CI)       |
| No epilepsy, no psychiatric disorder  | 1,984 (0.3%)            | 1.0 (ref)        | 972 (0.2%)            | 1.0 (ref)        | 89 (0.1%)                                       | 1.0 (ref)          |
| No epilepsy, any psychiatric disorder | 807 (1.2%)              | 2.8 (2.6-3.1)    | 174 (0.3%)            | 1.3 (1.1-1.5)    | 35 (0.1%)                                       | 3.6 (2.2-5.9)      |
| Epilepsy, no psychiatric disorder     | 2,397 (5.8%)            | 17.7 (16.2-19.3) | 1,087 (2.6%)          | 17.8 (15.8-20.0) | 540 (1.3%)                                      | 70.2 (49.0-100.4)  |
| Epilepsy, any psychiatric disorder    | 2,786 (9.8%)            | 21.9 (20.0-24.0) | 329 (1.2%)            | 5.4 (4.6-6.3)    | 769 (2.7%)                                      | 120.8 (82.6-176.8) |

**Note:** Number of deaths in epilepsy and associated controls, stratified by psychiatric diagnoses, and odds ratios adjusted for income, and marital and immigration statuses. aOR=adjusted odds ratio. Results are stratified into individuals with or without epilepsy and with or without any psychiatric disorder.

## Appendix 1. STROBE Statement—checklist of items that should be included in reports of observational studies

|                              | Item No | Recommendation                                                                                                                                                                             | Page # |
|------------------------------|---------|--------------------------------------------------------------------------------------------------------------------------------------------------------------------------------------------|--------|
| <b>Title and abstract</b>    | 1       | (a) Indicate the study's design with a commonly used term in the title or the abstract                                                                                                     | 1      |
|                              |         | (b) Provide in the abstract an informative and balanced summary of what was done and what was found                                                                                        | 1      |
| <b>Introduction</b>          |         |                                                                                                                                                                                            |        |
| Background/rationale         | 2       | Explain the scientific background and rationale for the investigation being reported                                                                                                       | 1      |
| Objectives                   | 3       | State specific objectives, including any prespecified hypotheses                                                                                                                           | 1      |
| <b>Methods</b>               |         |                                                                                                                                                                                            |        |
| Study design                 | 4       | Present key elements of study design early in the paper                                                                                                                                    | 1-2    |
| Setting                      | 5       | Describe the setting, locations, and relevant dates, including periods of recruitment, exposure, follow-up, and data collection                                                            | 2      |
| Participants                 | 6       | (a) <i>Cohort study</i> —Give the eligibility criteria, and the sources and methods of selection of participants. Describe methods of follow-up                                            | 2-3    |
|                              |         | <i>Case-control study</i> —Give the eligibility criteria, and the sources and methods of case ascertainment and control selection. Give the rationale for the choice of cases and controls |        |
|                              |         | <i>Cross-sectional study</i> —Give the eligibility criteria, and the sources and methods of selection of participants                                                                      |        |
|                              |         | (b) <i>Cohort study</i> —For matched studies, give matching criteria and number of exposed and unexposed                                                                                   | 3      |
|                              |         | <i>Case-control study</i> —For matched studies, give matching criteria and the number of controls per case                                                                                 |        |
| Variables                    | 7       | Clearly define all outcomes, exposures, predictors, potential confounders, and effect modifiers. Give diagnostic criteria, if applicable                                                   | 2-4    |
| Data sources/<br>measurement | 8*      | For each variable of interest, give sources of data and details of methods of assessment (measurement). Describe comparability of assessment methods if there is more than one group       | 2-3    |
| Bias                         | 9       | Describe any efforts to address potential sources of bias                                                                                                                                  | 3-4    |
| Study size                   | 10      | Explain how the study size was arrived at                                                                                                                                                  | 2      |
| Quantitative variables       | 11      | Explain how quantitative variables were handled in the analyses. If applicable, describe which groupings were chosen and why                                                               | 2-4    |
| Statistical methods          | 12      | (a) Describe all statistical methods, including those used to control for confounding                                                                                                      | 3-4    |
|                              |         | (b) Describe any methods used to examine subgroups and interactions                                                                                                                        | 3-4    |
|                              |         | (c) Explain how missing data were addressed                                                                                                                                                | 3      |
|                              |         | (d) <i>Cohort study</i> —If applicable, explain how loss to follow-up was addressed<br><i>Case-control study</i> —If applicable, explain how matching of cases and controls was addressed  | 3      |
|                              |         | (e) <i>Cross-sectional study</i> —If applicable, describe analytical methods taking account of sampling strategy                                                                           | 3-4    |

| <b>Results</b>           |     |                                                                                                                                                                                                              |     |
|--------------------------|-----|--------------------------------------------------------------------------------------------------------------------------------------------------------------------------------------------------------------|-----|
| Participants             | 13* | (a) Report numbers of individuals at each stage of study—eg numbers potentially eligible, examined for eligibility, confirmed eligible, included in the study, completing follow-up, and analysed            | 4   |
|                          |     | (b) Give reasons for non-participation at each stage                                                                                                                                                         | --  |
|                          |     | (c) Consider use of a flow diagram                                                                                                                                                                           | --  |
| Descriptive data         | 14* | (a) Give characteristics of study participants (eg demographic, clinical, social) and information on exposures and potential confounders                                                                     | 2,4 |
|                          |     | (b) Indicate number of participants with missing data for each variable of interest                                                                                                                          | 2   |
|                          |     | (c) <i>Cohort study</i> —Summarise follow-up time (eg, average and total amount)                                                                                                                             | 4   |
| Outcome data             | 15* | <i>Cohort study</i> —Report numbers of outcome events or summary measures over time                                                                                                                          | 4   |
|                          |     | <i>Case-control study</i> —Report numbers in each exposure category, or summary measures of exposure                                                                                                         |     |
|                          |     | <i>Cross-sectional study</i> —Report numbers of outcome events or summary measures                                                                                                                           |     |
| Main results             | 16  | (a) Give unadjusted estimates and, if applicable, confounder-adjusted estimates and their precision (eg, 95% confidence interval). Make clear which confounders were adjusted for and why they were included | 4   |
|                          |     | (b) Report category boundaries when continuous variables were categorized                                                                                                                                    | 4   |
|                          |     | (c) If relevant, consider translating estimates of relative risk into absolute risk for a meaningful time period                                                                                             | 5   |
| Other analyses           | 17  | Report other analyses done—eg analyses of subgroups and interactions, and sensitivity analyses                                                                                                               | 4-6 |
| <b>Discussion</b>        |     |                                                                                                                                                                                                              |     |
| Key results              | 18  | Summarise key results with reference to study objectives                                                                                                                                                     | 6   |
| Limitations              | 19  | Discuss limitations of the study, taking into account sources of potential bias or imprecision. Discuss both direction and magnitude of any potential bias                                                   | 7-8 |
| Interpretation           | 20  | Give a cautious overall interpretation of results considering objectives, limitations, multiplicity of analyses, results from similar studies, and other relevant evidence                                   | 6-8 |
| Generalisability         | 21  | Discuss the generalisability (external validity) of the study results                                                                                                                                        | 7-8 |
| <b>Other information</b> |     |                                                                                                                                                                                                              |     |
| Funding                  | 22  | Give the source of funding and the role of the funders for the present study and, if applicable, for the original study on which the present article is based                                                | 8   |

\*Give information separately for cases and controls in case-control studies and, if applicable, for exposed and unexposed groups in cohort and cross-sectional studies.

**Note:** An Explanation and Elaboration article discusses each checklist item and gives methodological background and published examples of transparent reporting. The STROBE checklist is best used in conjunction with this article (freely available on the Web sites of PLoS Medicine at <http://www.plosmedicine.org/>, Annals of Internal Medicine at <http://www.annals.org/>, and Epidemiology at <http://www.epidem.com/>). Information on the STROBE Initiative is available at [www.strobe-statement.org](http://www.strobe-statement.org)
